# Supplementary material for: Dynamic quenching mechanism based optical detection of carcinogenic Cr(vi) in water and on economical paper test strips via a conjugated polymer
Source: Royal Society of Chemistry journal article supplement (doi:10.1039/d3lp00195d), 2023-10-16
Supplement: d3lp00195d1.pdf [file d3lp00195d1.pdf]

## **Electronic Supplementary Information**

Dynamic quenching mechanism based optical detection of carcinogenic Cr(VI) in water and on economical paper test strips via a conjugated polymer

*Arvin Sain Tanwar,<sup>a,b</sup> Moirangthem Anita Chanu,<sup>a</sup> Retwik Parui,<sup>a</sup> Debika Barman,<sup>a</sup> Yeon-Ho Im,<sup>b,\*</sup> and Parameswar Krishnan Iyer<sup>a,c,\*</sup>*

<sup>a</sup>Department of Chemistry, Indian Institute of Technology Guwahati, Guwahati-781039, India.

<sup>b</sup>School of Semiconductor and Chemical Engineering, Clean Energy Research Center, Jeonbuk National University, Jeonju, Jeonbuk 54896, Republic of Korea.

<sup>c</sup>Centre for Nanotechnology, Indian Institute of Technology Guwahati, Guwahati, 781039, India.

EMAIL ADDRESS: pki@iitg.ac.in (P. K. Iyer); yeonhoim@jbnu.ac.kr (Y. H. Im)

AUTHOR FAX: +91 361 258 2349

**Table S1:** Fluorescence lifetime decay of each component and their fractions in water.

| Sample                                 | $\tau_1$<br>(ns) | %      | $\tau_2$<br>(ns) | %      | $\chi^2$ | $\tau_{\text{avg}}$<br>(ns) |
|----------------------------------------|------------------|--------|------------------|--------|----------|-----------------------------|
| PFPy                                   | 1.281            | 24.534 | 4.836            | 75.466 | 1.030    | 3.96                        |
| PFPy + Cr(VI)<br>(6.66 $\mu\text{M}$ ) | 0.993            | 42.583 | 4.118            | 57.417 | 1.064    | 2.78                        |
| PFPy + Cr(VI)<br>(13.3 $\mu\text{M}$ ) | 0.709            | 48.564 | 3.274            | 51.436 | 1.060    | 2.16                        |
| PFPy + Cr(VI)<br>(20.0 $\mu\text{M}$ ) | 0.581            | 55.356 | 2.716            | 44.644 | 1.041    | 1.53                        |

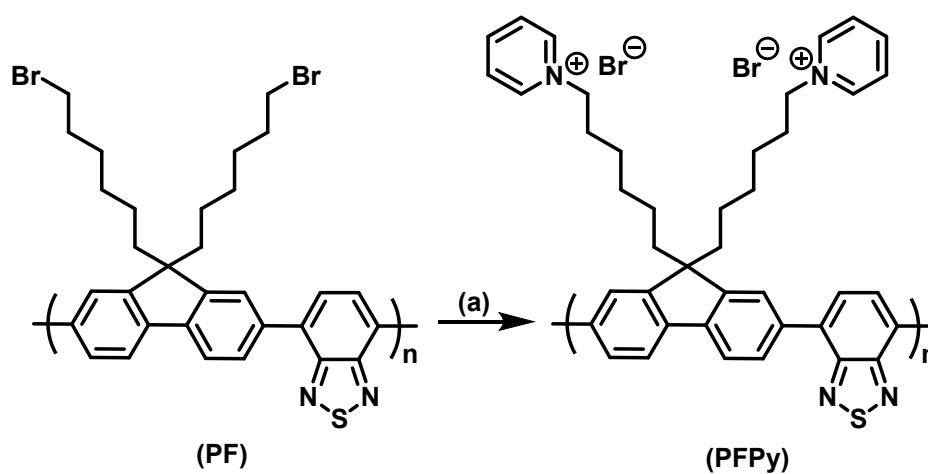

**Scheme S1.** Synthesis of PFPy (a) pyridine, DMF, 70°C, 24 h.

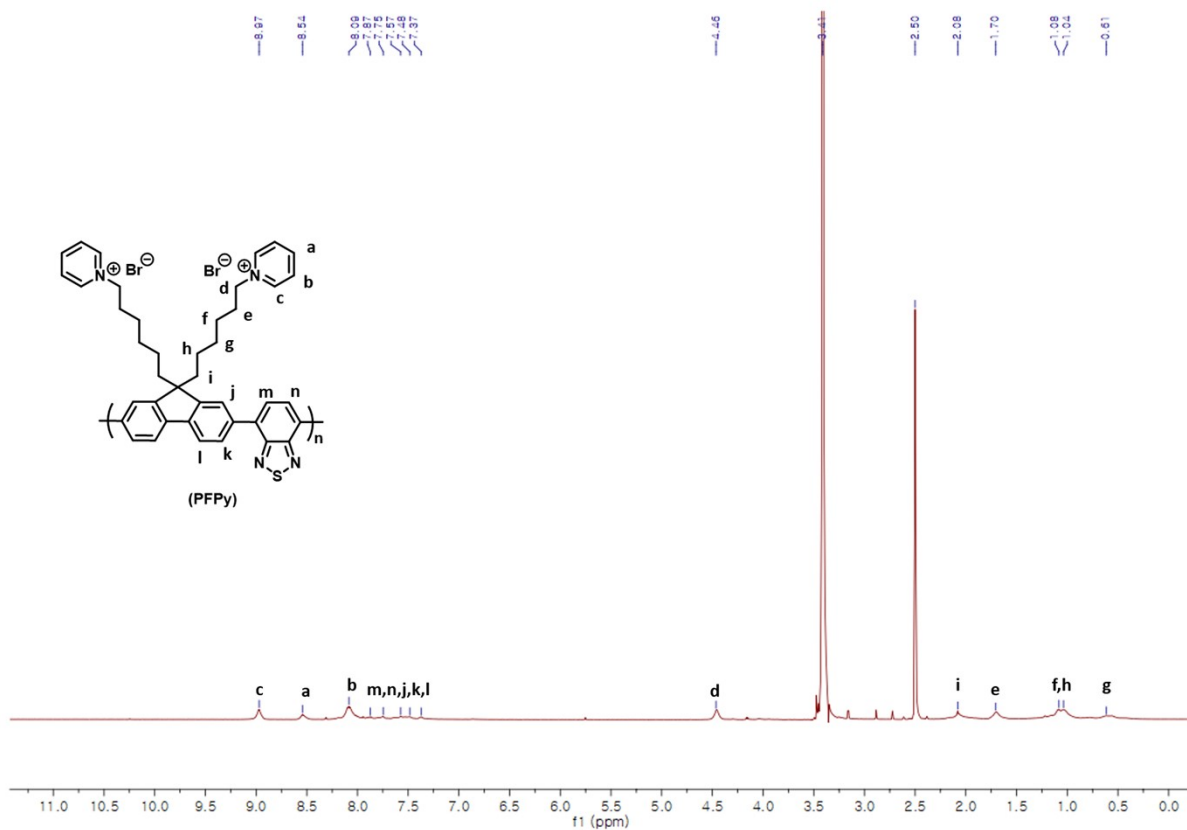

**Fig. S1** <sup>1</sup>H NMR spectra of PFPy.

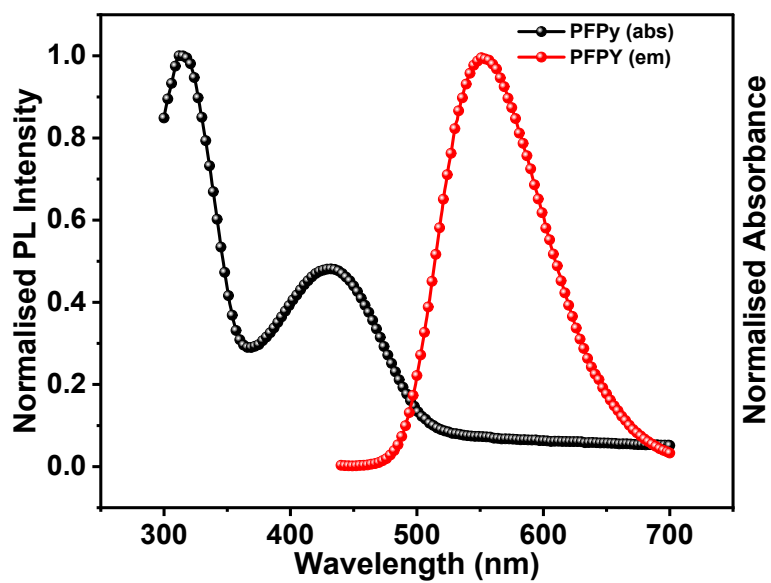

**Fig. S2** UV-Vis spectrum and PL spectrum of PFPy.

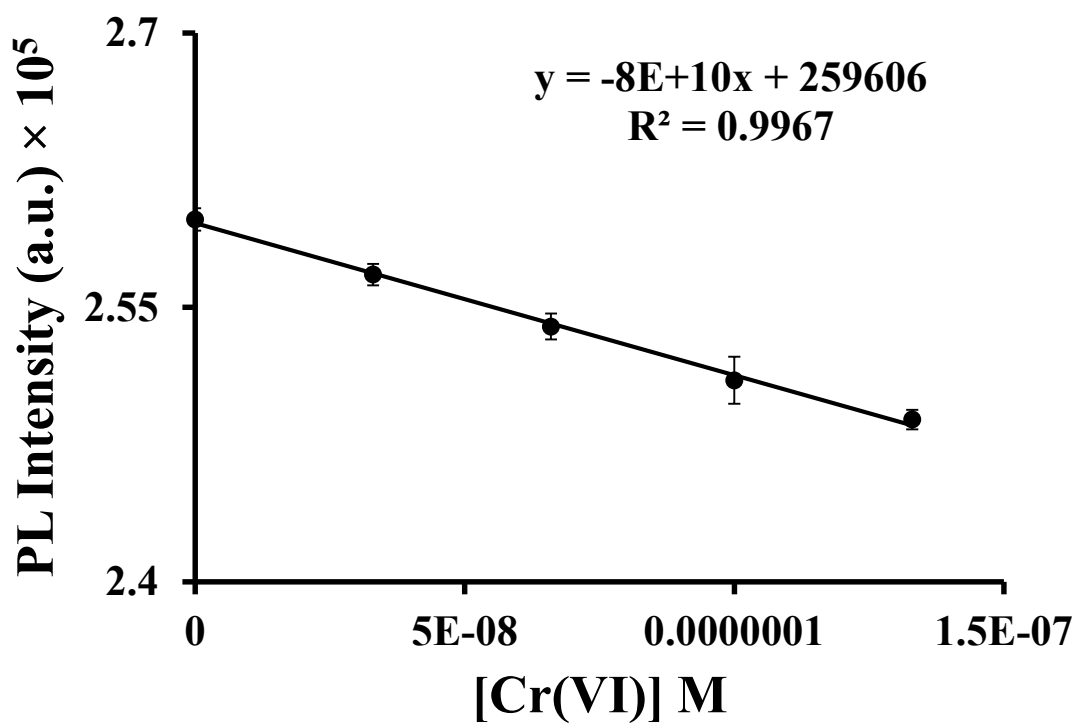

**Fig. S3** Fluorescence intensity of PFPy vs Cr(VI) concentration.

$$\text{LOD} = 3 \times \text{S.D.}/k$$

$$\text{LOD} = 3 \times 616.16 / (8 \times 10^{10})$$

$$\text{LOD} = 23.1 \text{ nM}$$

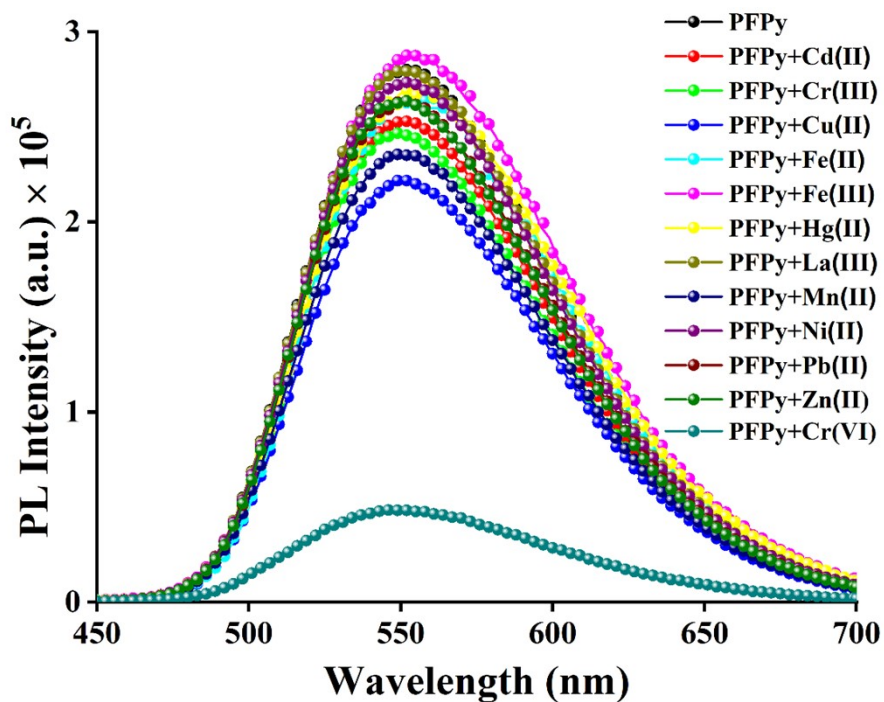

Fig. S4 PL spectra of PFPy in presence of various metal ions in water.

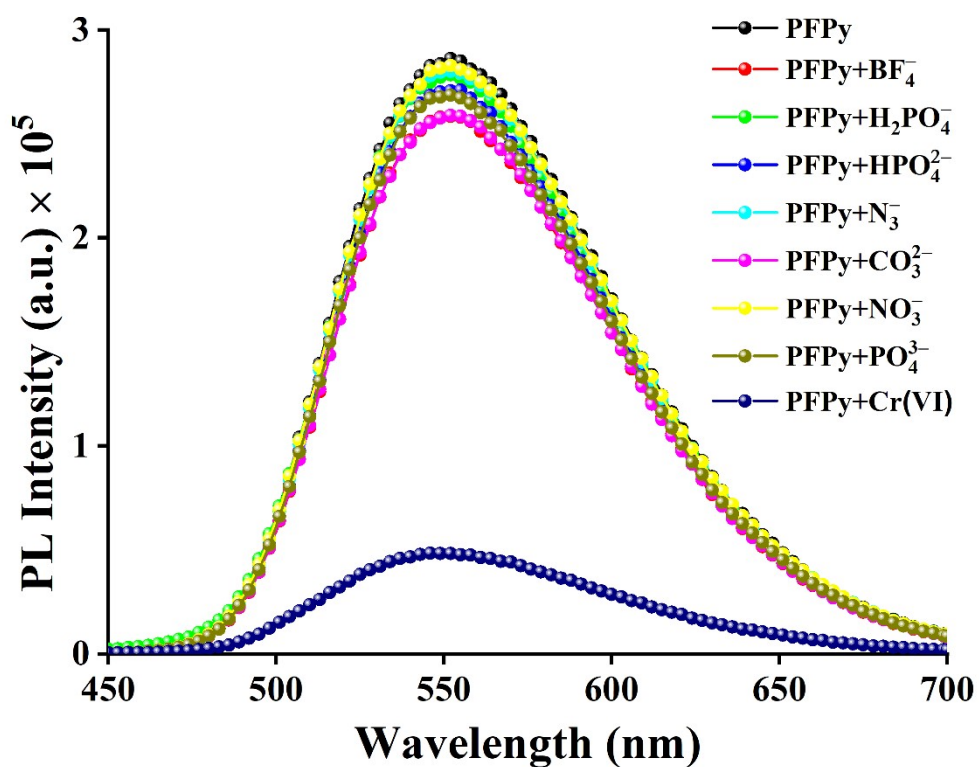

Fig. S5 PL spectra of PFPy in presence of various anions in water.

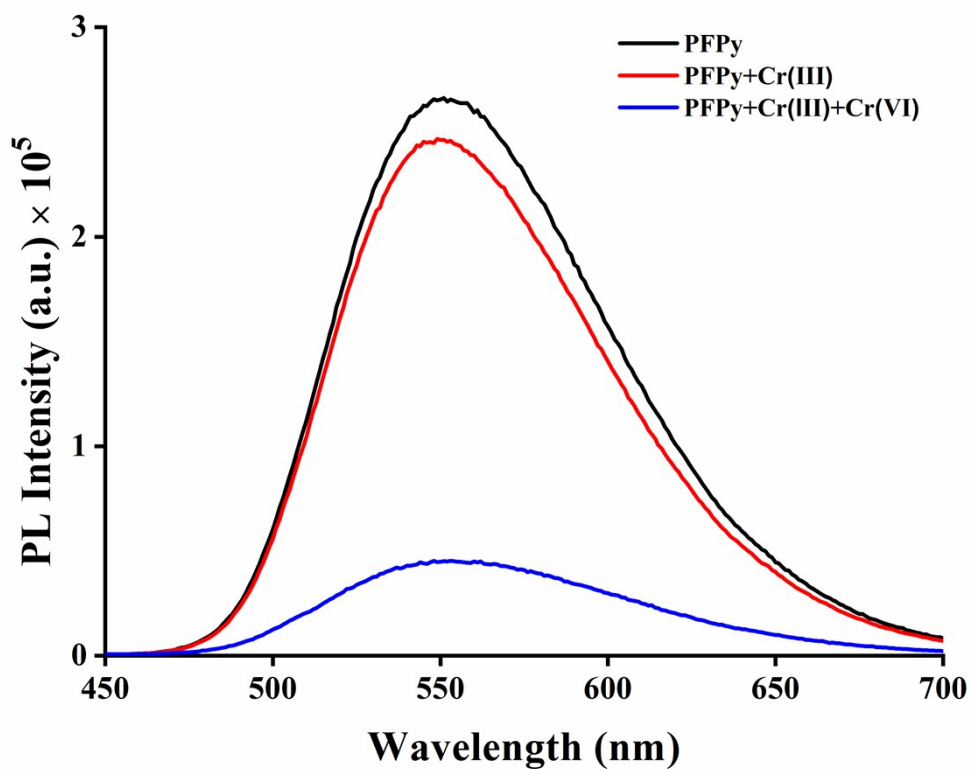

**Fig. S6** PL spectra of PFPy (black), PFPy in presence of Cr(III) (20  $\mu$ M) (Red), followed by addition of Cr(VI) (20  $\mu$ M).

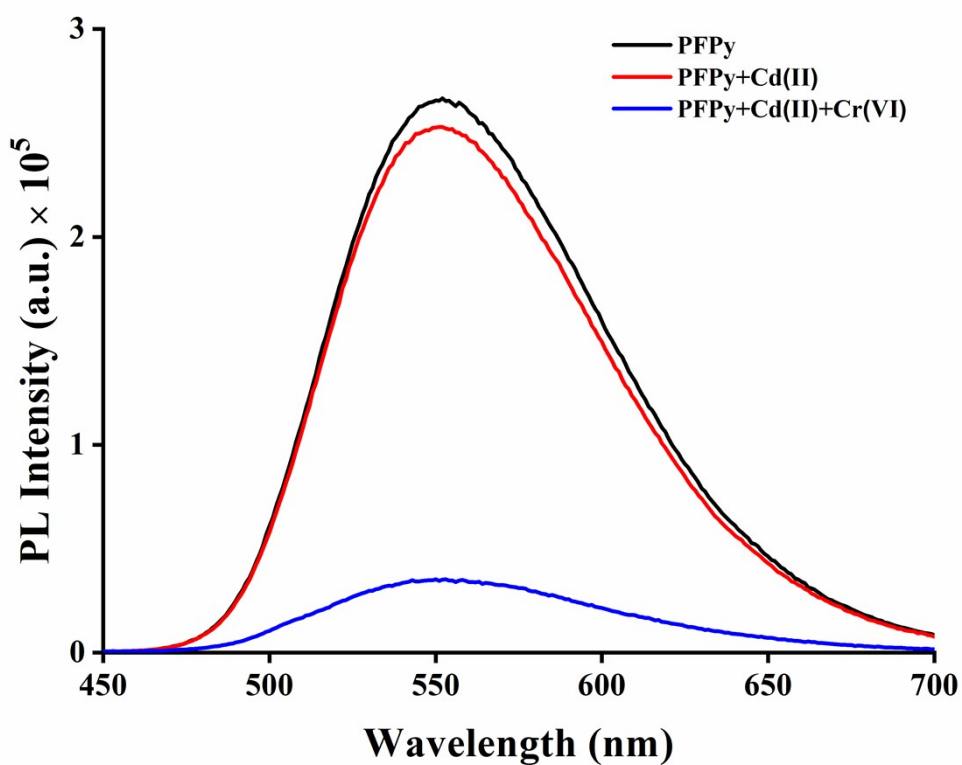

**Fig. S7** PL spectra of PFPy (black), PFPy in presence of Cd(II) (20  $\mu$ M) (Red), followed by addition of Cr(VI) (20  $\mu$ M).

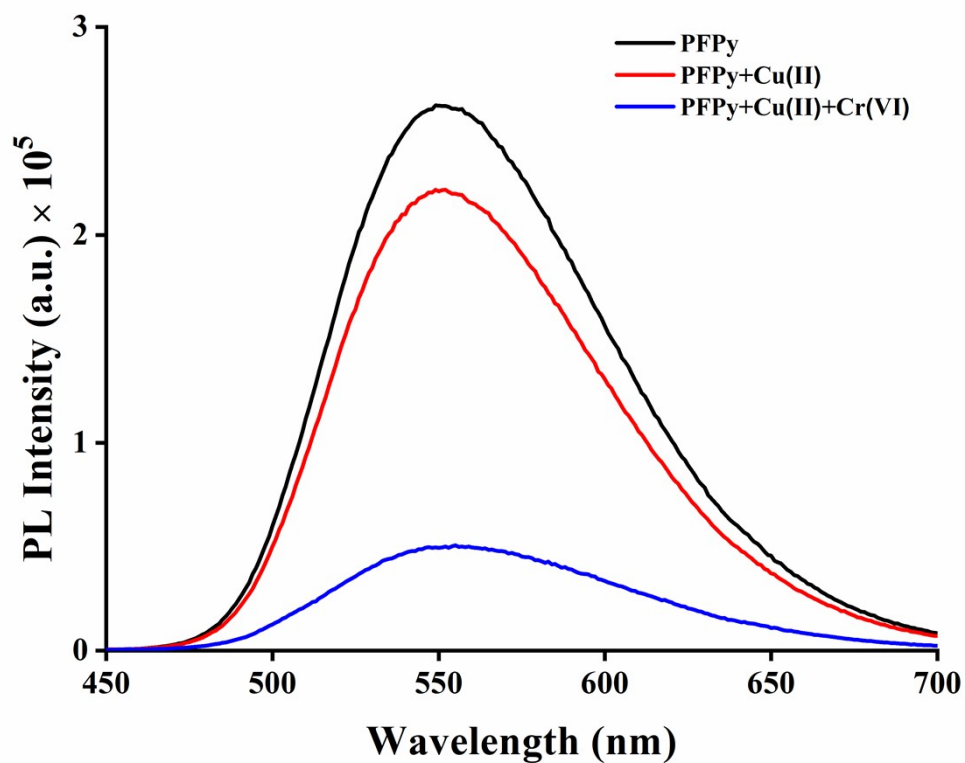

**Fig. S8** PL spectra of PFPy (black), PFPy in presence of Cu(II) (20  $\mu$ M) (Red), followed by addition of Cr(VI) (20  $\mu$ M).

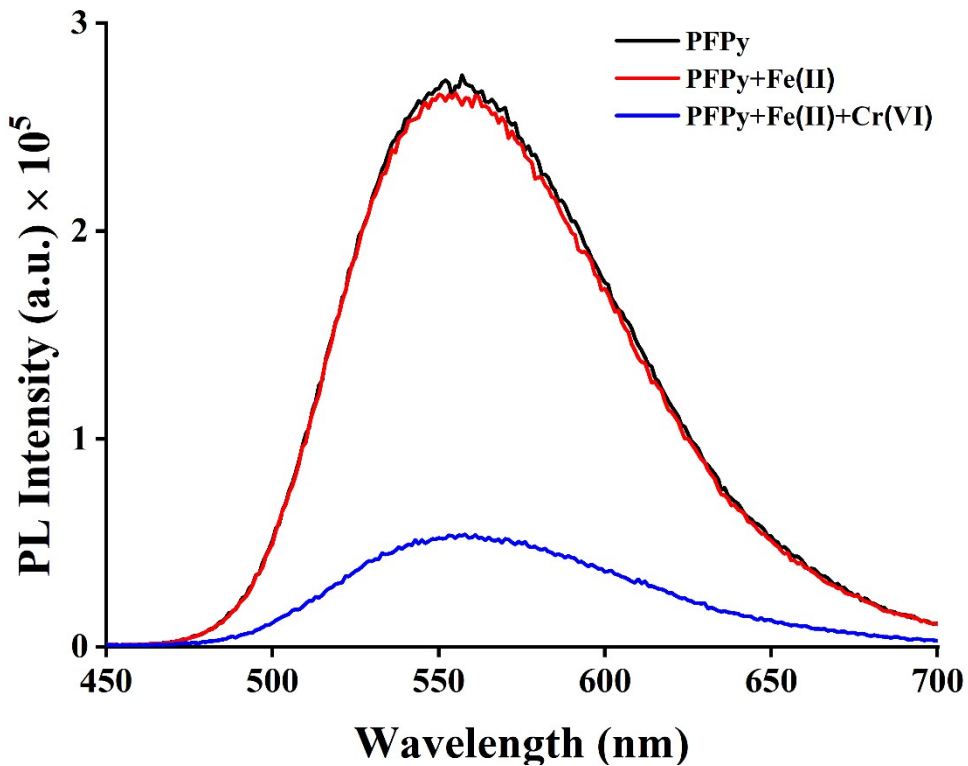

**Fig. S9** PL spectra of PFPy (black), PFPy in presence of Fe(II) (20  $\mu$ M) (Red), followed by addition of Cr(VI) (20  $\mu$ M).

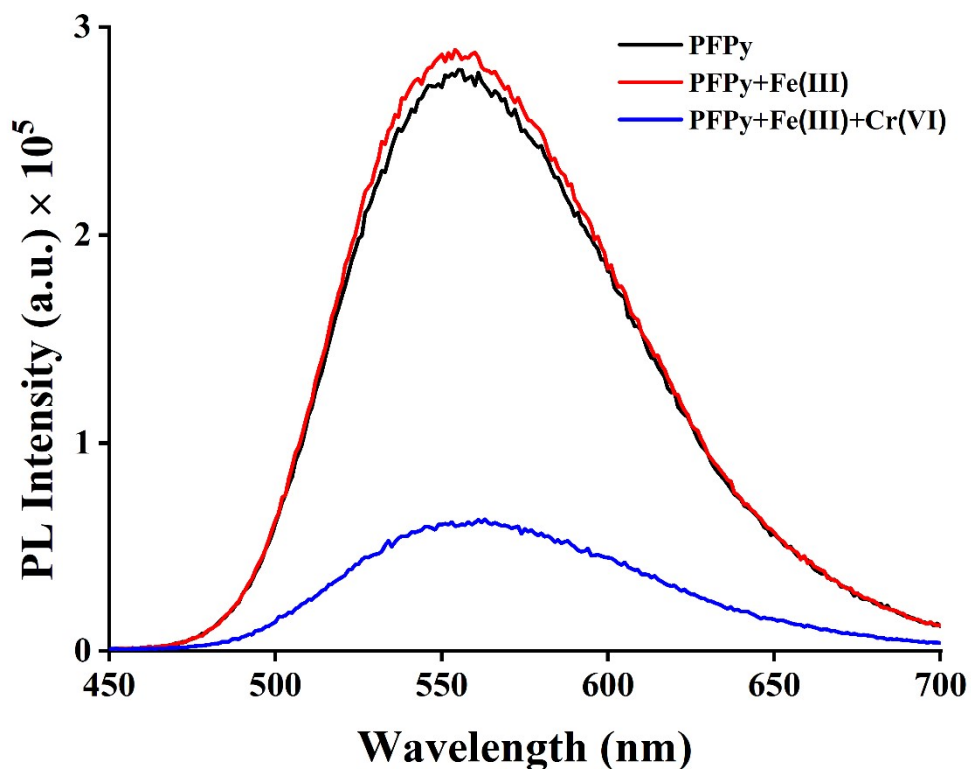

**Fig. S10** PL spectra of PFPy (black), PFPy in presence of Fe(III) (20  $\mu$ M) (Red), followed by addition of Cr(VI) (20  $\mu$ M).

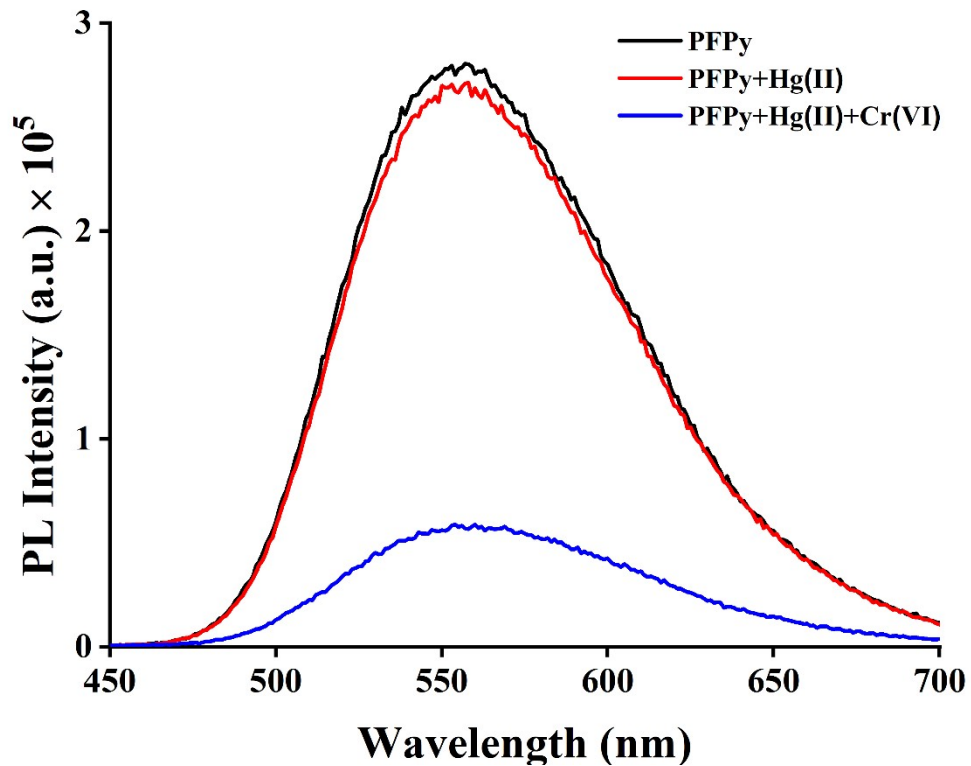

**Fig. S11** PL spectra of PFPy (black), PFPy in presence of Hg(II) (20  $\mu$ M) (Red), followed by addition of Cr(VI) (20  $\mu$ M).



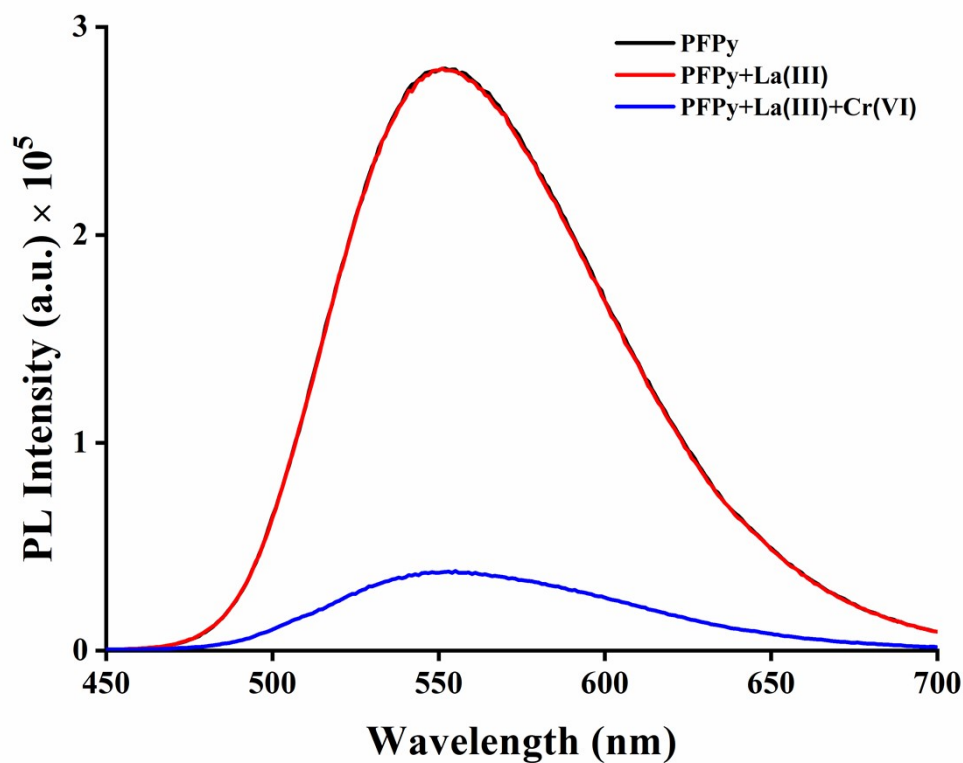

**Fig. S12** PL spectra of PFPy (black), PFPy in presence of La(III) (20  $\mu$ M) (Red), followed by addition of Cr(VI) (20  $\mu$ M).

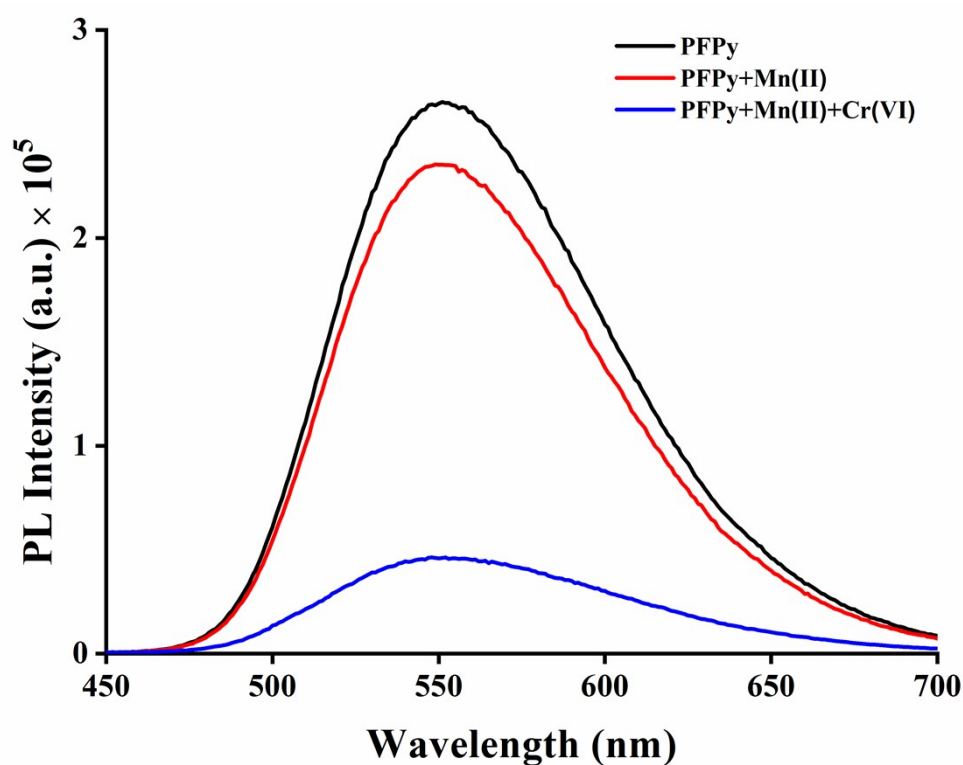

**Fig. S13** PL spectra of PFPy (black), PFPy in presence of Mn(II) (20  $\mu$ M) (Red), followed by addition of Cr(VI) (20  $\mu$ M).

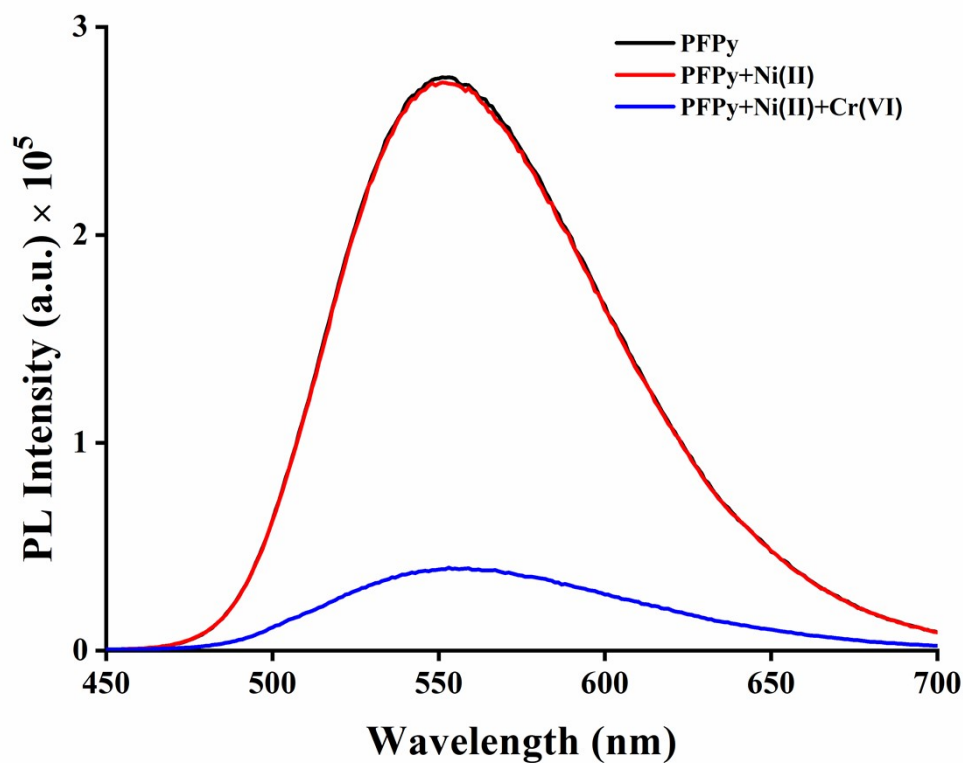

**Fig. S14** PL spectra of PFPy (black), PFPy in presence of Ni(II) (20  $\mu$ M) (Red), followed by addition of Cr(VI) (20  $\mu$ M).

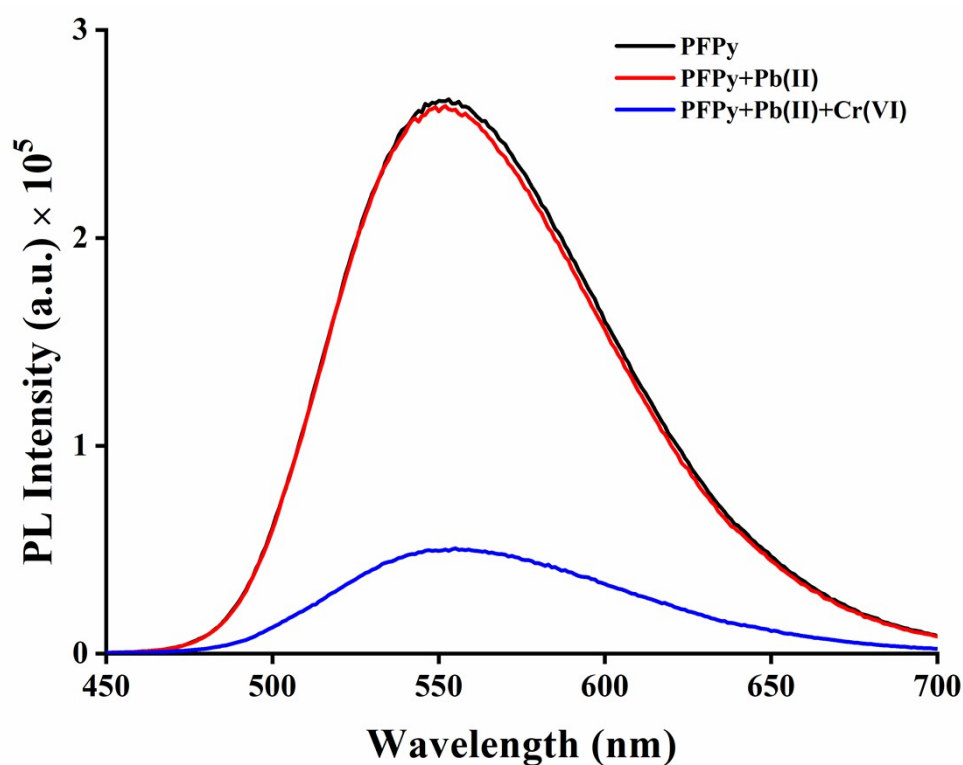

**Fig. S15** PL spectra of PFPy (black), PFPy in presence of Pb(II) (20  $\mu$ M) (Red), followed by addition of Cr(VI) (20  $\mu$ M).

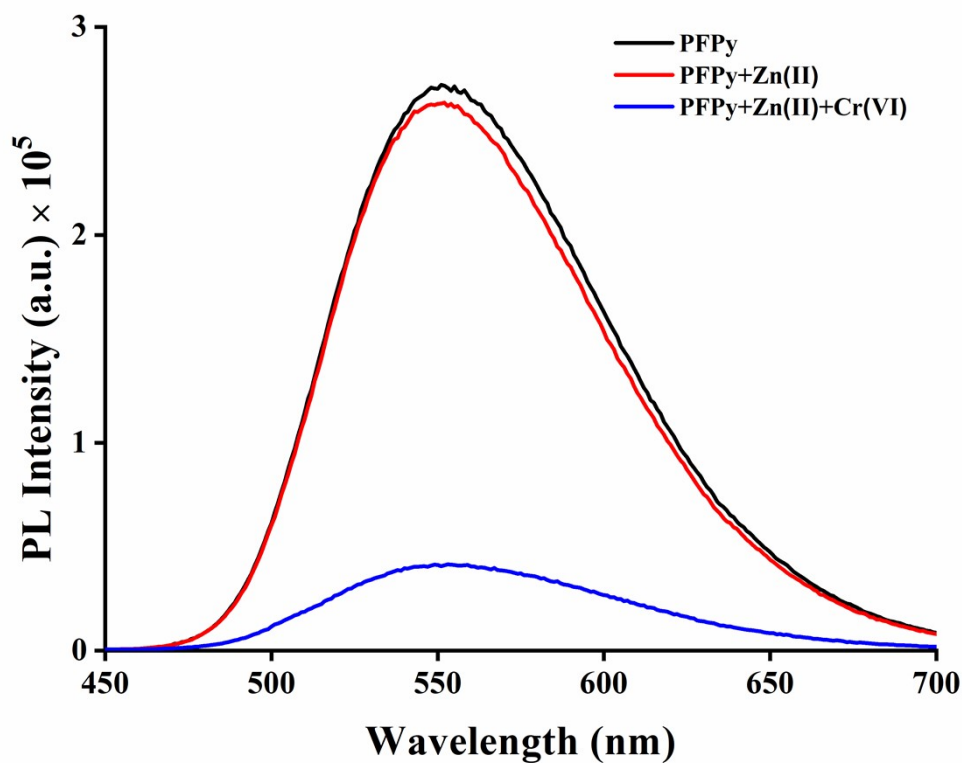

**Fig. S16** PL spectra of PFPy (black), PFPy in presence of Zn(II) (20 μM) (Red), followed by addition of Cr(VI) (20 μM).

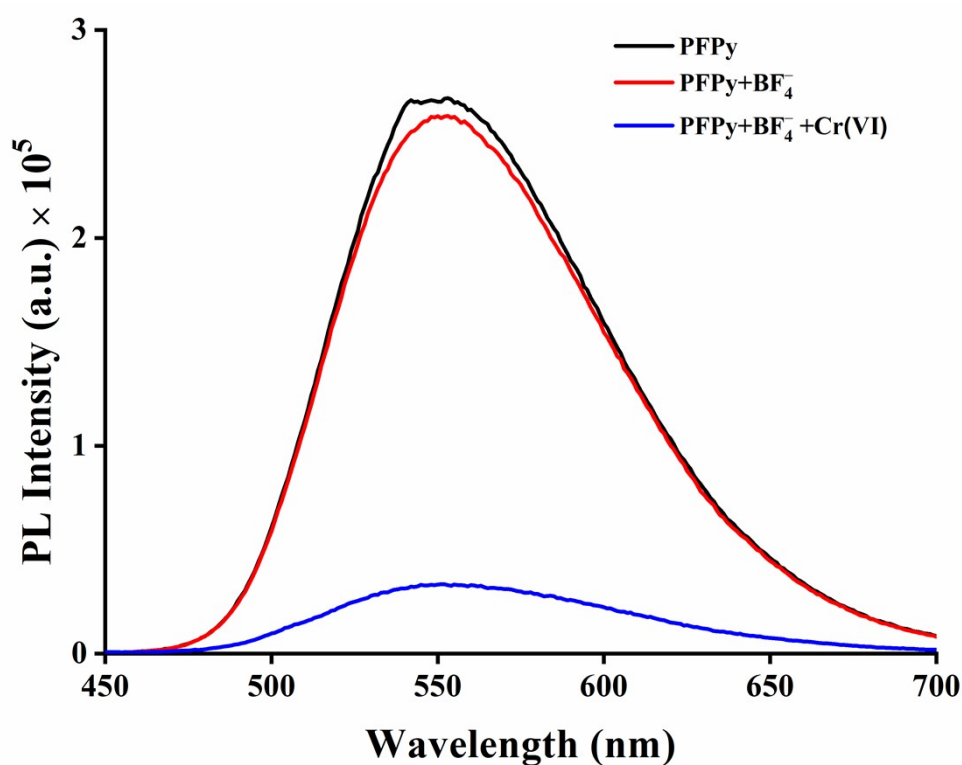

**Fig. S17** PL spectra of PFPy (black), PFPy in presence of BF<sub>4</sub><sup>-</sup> (20 μM) (Red), followed by addition of Cr(VI) (20 μM).

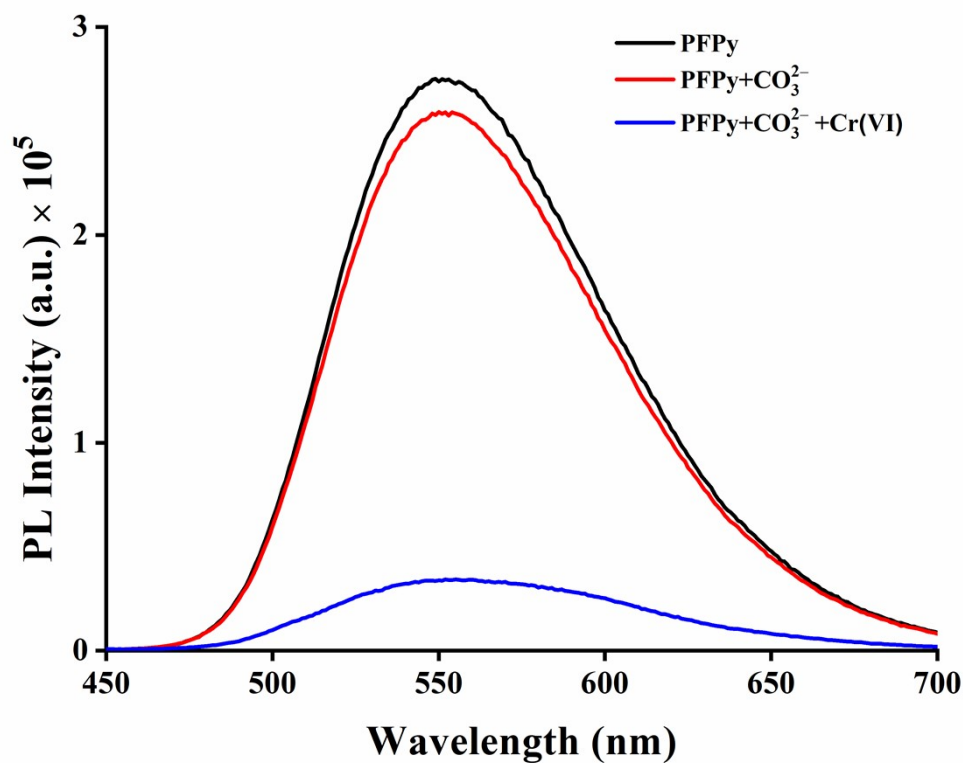

**Fig. S18** PL spectra of PFPy (black), PFPy in presence of CO<sub>3</sub><sup>2-</sup> (20  $\mu$ M) (Red), followed by addition of Cr(VI) (20  $\mu$ M).

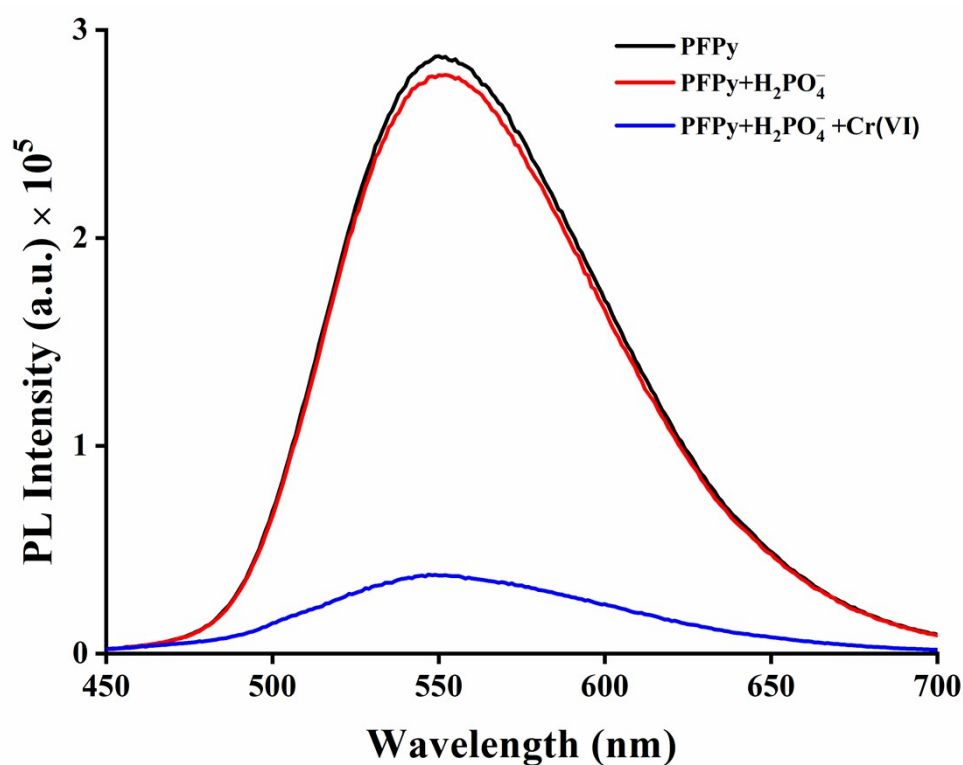

**Fig. S19** PL spectra of PFPy (black), PFPy in presence of H<sub>2</sub>PO<sub>4</sub><sup>-</sup> (20  $\mu$ M) (Red), followed by addition of Cr(VI) (20  $\mu$ M).

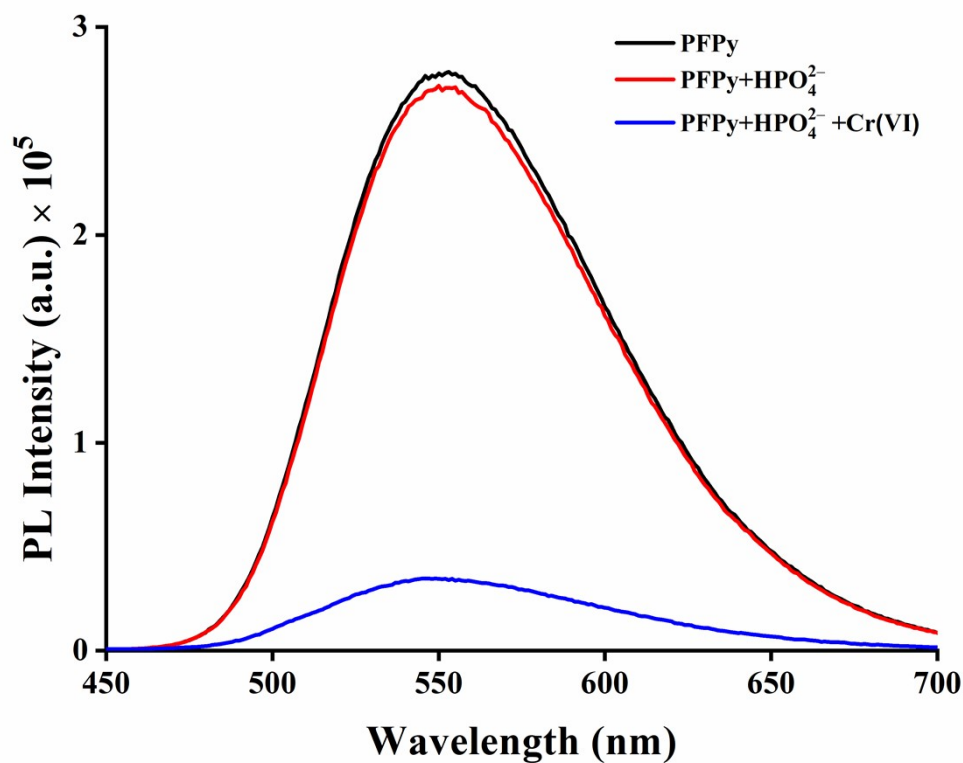

**Fig. S20** PL spectra of PFPy (black), PFPy in presence of HPO<sub>4</sub><sup>2-</sup> (20 μM) (Red), followed by addition of Cr(VI) (20 μM).

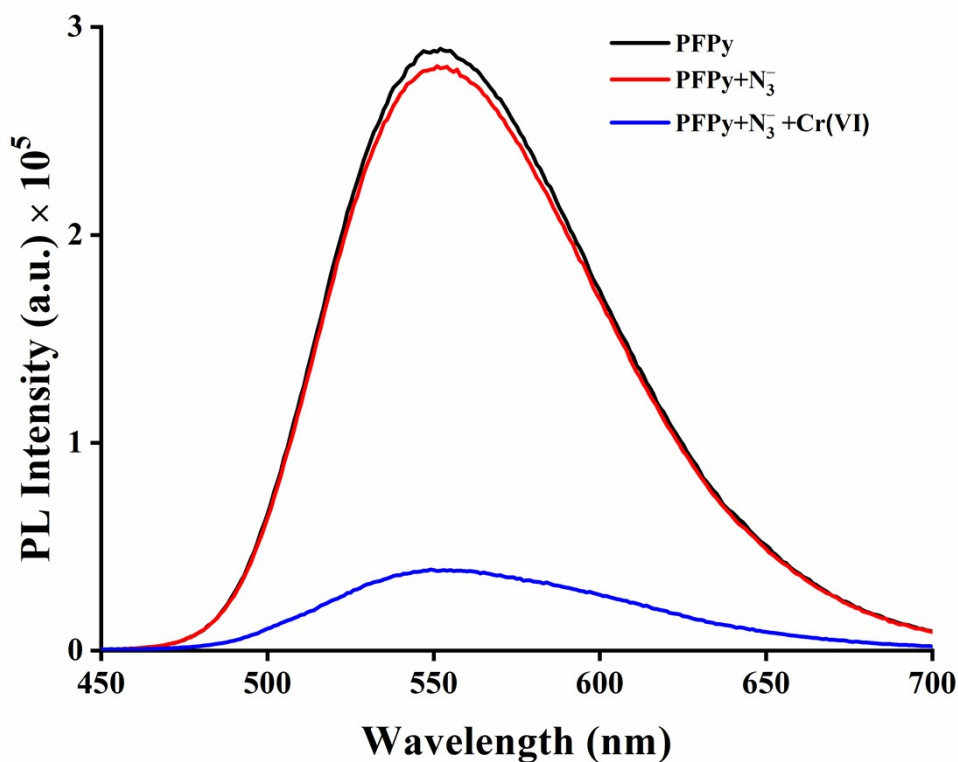

**Fig. S21** PL spectra of PFPy (black), PFPy in presence of N<sub>3</sub><sup>-</sup> (20 μM) (Red), followed by addition of Cr(VI) (20 μM).

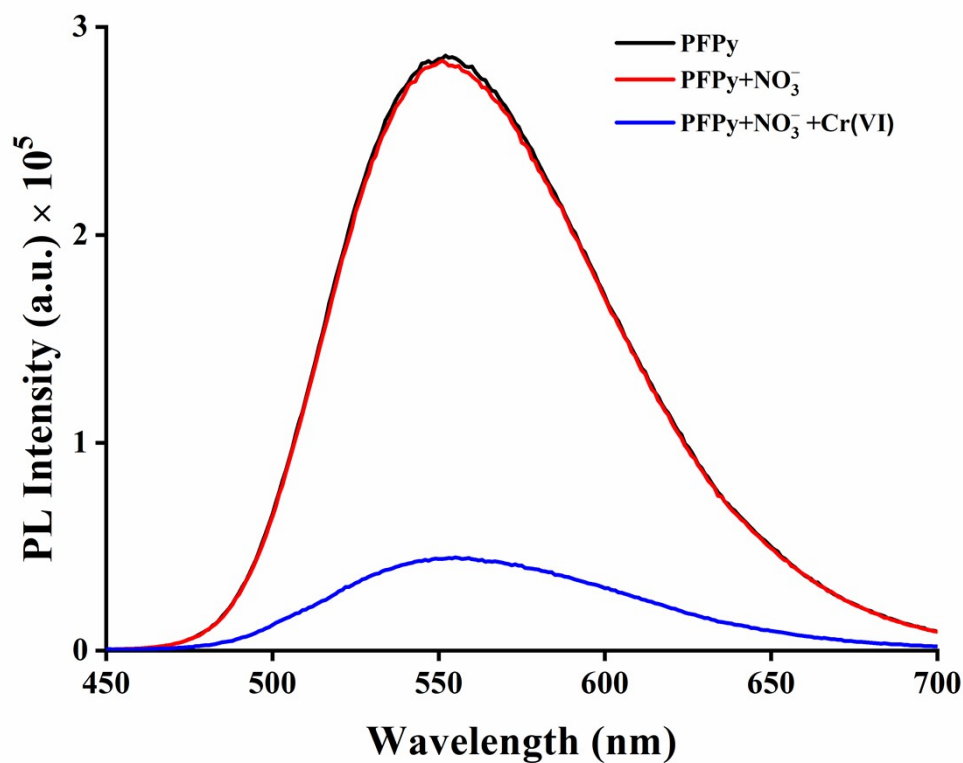

**Fig. S22** PL spectra of PFPy (black), PFPy in presence of NO<sub>3</sub><sup>-</sup> (20  $\mu$ M) (Red), followed by addition of Cr(VI) (20  $\mu$ M).

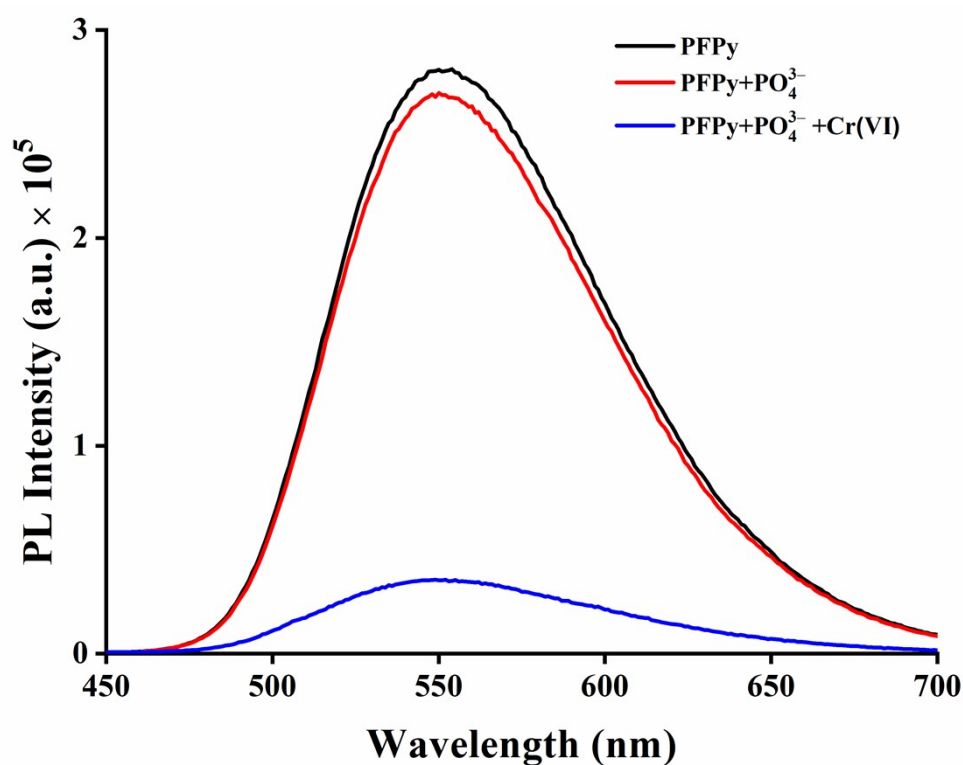

**Fig. S23** PL spectra of PFPy (black), PFPy in presence of PO<sub>4</sub><sup>3-</sup> (20  $\mu$ M) (Red), followed by addition of Cr(VI) (20  $\mu$ M).

**Table S2.** Förster distance, Overlap integral  $J(\lambda)$  values and RET efficiency calculated for Cr(VI).

| Solvent | Förster distance $R_0$ (Å) | $J(\lambda)$ values<br>( $M^{-1}cm^{-1}nm^4$ ) | RET efficiency<br>(%) |
|---------|----------------------------|------------------------------------------------|-----------------------|
| water   | 11.32                      | $1.92 \times 10^{11}$                          | 61.63                 |

**Table S3.** IFE corrections for quenching of PFPy by Cr(VI).

| Cr(VI) [ $\mu$ M] | $I_{obs}$   | $I_{corr}$  | $I_{corr}/I_{obs}$<br>Correction factor<br>(CF) | $I_{corr}/I_{corr,o}$ | $E_{obs}$<br>(%) | $E_{corr}$<br>(%) |
|-------------------|-------------|-------------|-------------------------------------------------|-----------------------|------------------|-------------------|
| 0                 | 263622.4958 | 268827.0506 | 1.0197                                          | 1                     | 0                | 0                 |
| 0.333             | 148114.007  | 150652.9469 | 1.0171                                          | 0.5604                | 43.816           | 43.959            |
| 0.666             | 108507.3325 | 110463.9547 | 1.018                                           | 0.4109                | 58.84            | 58.909            |
| 1                 | 82279.20539 | 83891.62152 | 1.0196                                          | 0.3121                | 68.789           | 68.793            |
| 1.333             | 70238.41289 | 71800.37123 | 1.0222                                          | 0.2671                | 73.356           | 73.291            |
| 1.666             | 56550.82416 | 57928.25398 | 1.0244                                          | 0.2155                | 78.549           | 78.451            |
| 2                 | 48193.63477 | 49516.86969 | 1.0275                                          | 0.1842                | 81.719           | 81.58             |

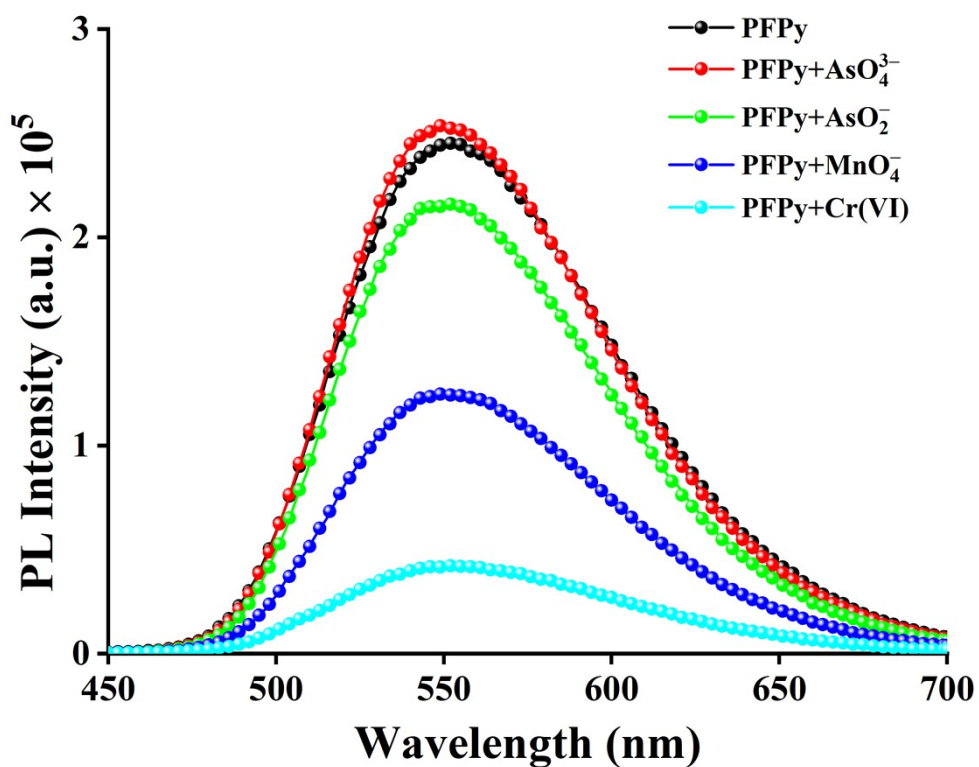**Fig. S24** PL spectra of PFPy in the presence of various oxoanions.

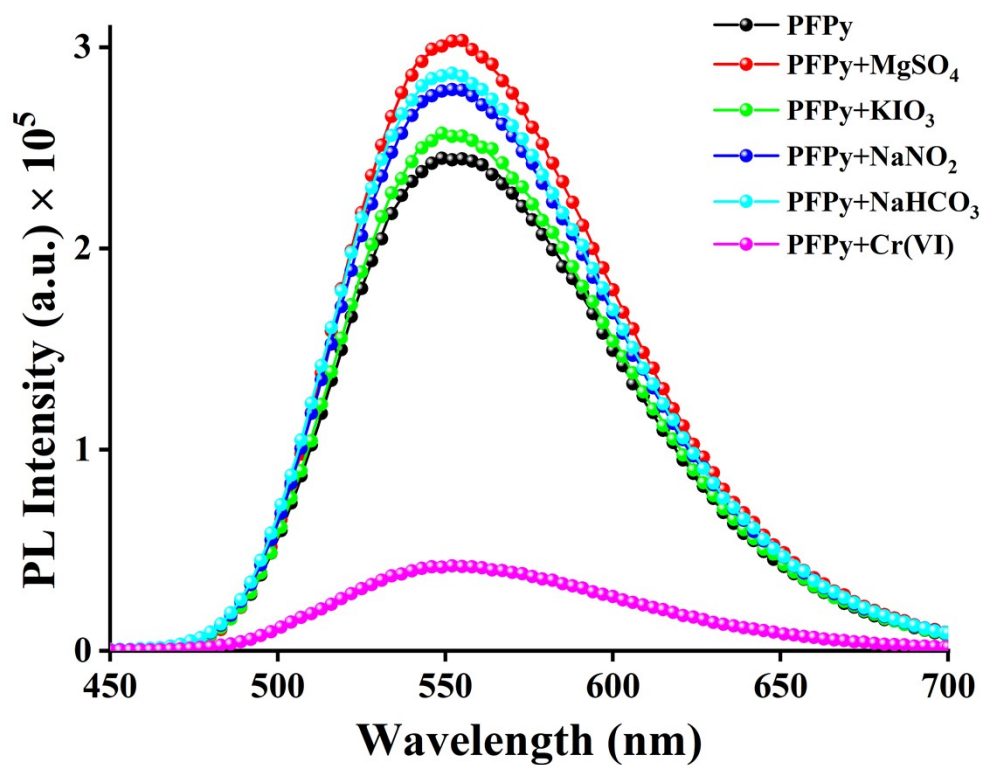

Fig. S25 PL spectra of PFPy in the presence of various electrolytes.

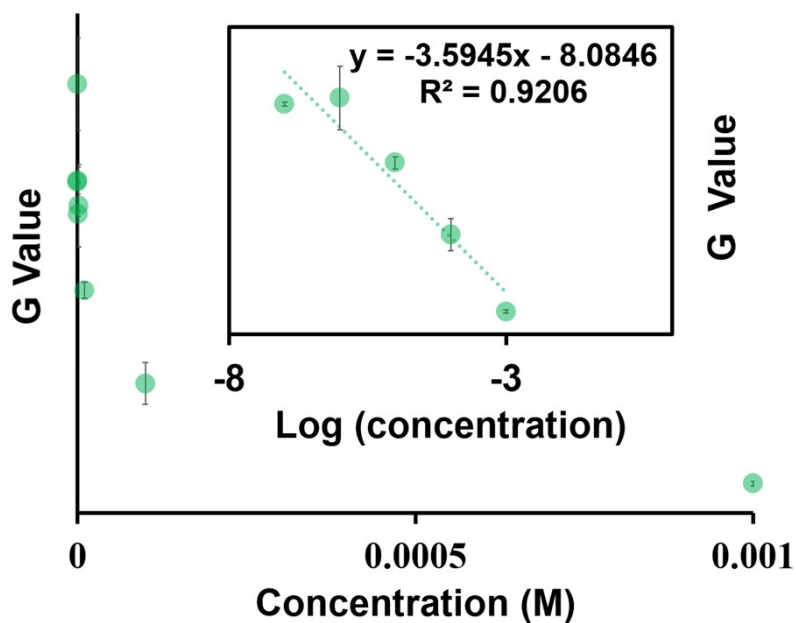

Fig. S26 G values obtained for various paper test strips after exposure to various concentrations of Cr(VI) solutions. (inset: a linear plot of G value vs Log (concentration of Cr(VI))).



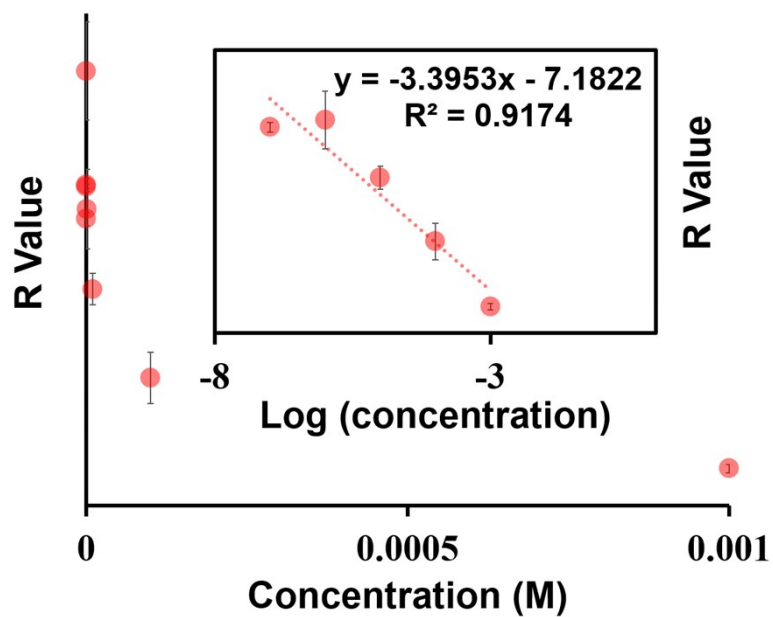

**Fig. S27** R values obtained for various paper test strips after exposure to various concentrations of Cr(VI) solutions. (inset: a linear plot of R-value vs Log (concentration of Cr(VI))).

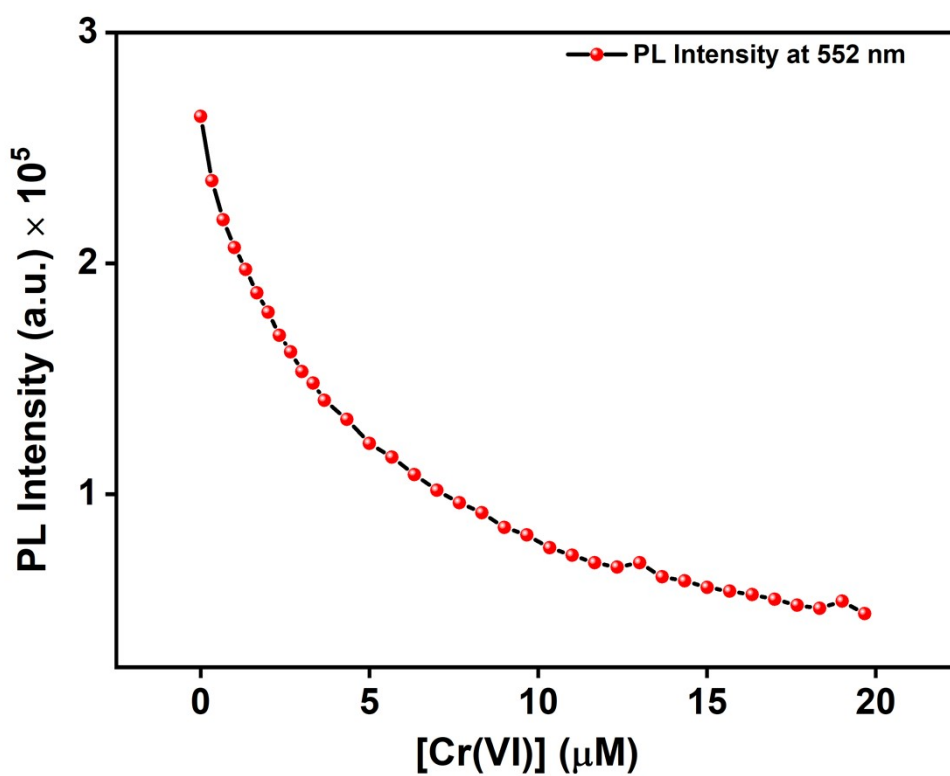

**Fig. S28** Calibration plot obtained for Cr(VI).

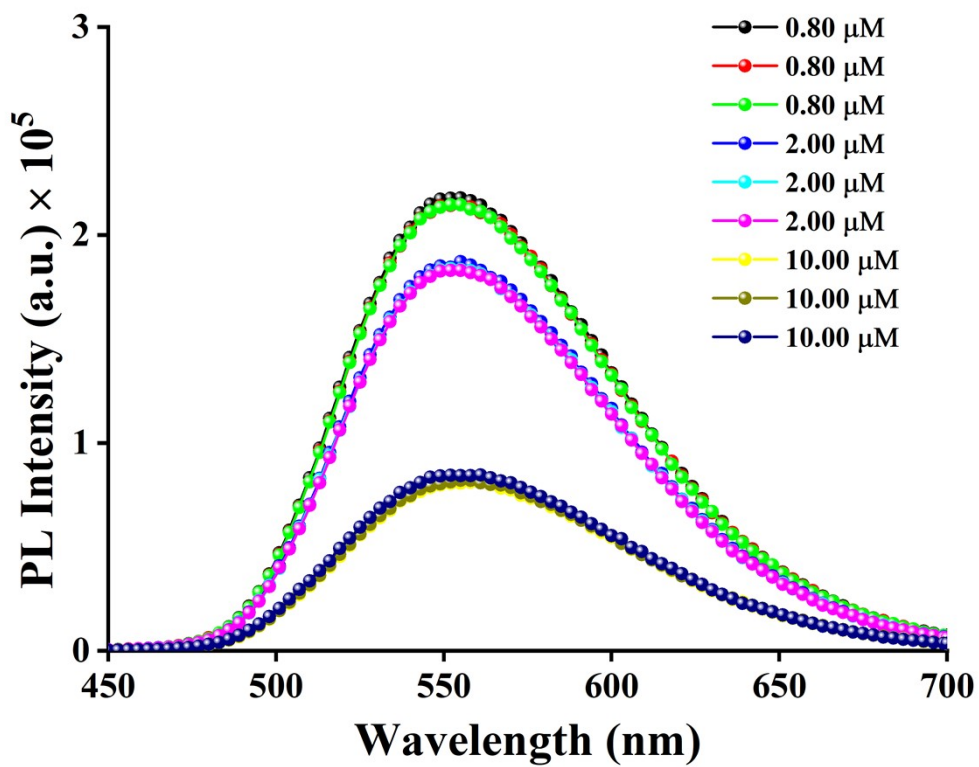

Fig. S29 PL spectra of PFPy with different samples of lake water spiked with different Cr(VI) concentrations.
